# Supplementary material for: Cytoplasmic-genetic male sterility gene provides direct evidence for some hybrid rice recently evolving into weedy rice
Source: PubMed Central journal article supplement (PMC4445040; doi:10.1038/srep10591), 2015-05-27
Supplement: srep10591-s1.pdf [file srep10591-s1.pdf]

## **Supplementary information**

### **Cytoplasmic-genetic male sterility gene provides direct evidence for some hybrid rice recently evolving into weedy rice**

Jingxu Zhang<sup>1</sup>, Zuomei Lu<sup>2</sup>, Weimin Dai<sup>1</sup>, Xiaoling Song<sup>1</sup>, Yufa Peng<sup>3</sup>, Bernal E. Valverde<sup>1,4</sup>, Sheng Qiang<sup>1\*</sup>

<sup>1</sup>Weed Research Laboratory of Nanjing Agricultural University, No.1 Weigang, Xuanwu District, Nanjing 210095, China; <sup>2</sup>State Key Laboratory of Crop Genetics & Germplasm Enhancement, Nanjing Agricultural University, No.1 Weigang, Xuanwu District, Nanjing 210095, China; <sup>3</sup>Institute of Plant Protection, China Academy of Agricultural Sciences, No.2 Yuanmingyuan West Road, Beijing 100193, China; <sup>4</sup>Faculty of Life Sciences, The University of Copenhagen, Højebakkegaard Allé 13, Taastrup, DK-2630, Denmark.

Correspondence and requests for materials should be addressed to Sheng Qiang  
E-mail: wrl@njau.edu.cn

**Supplementary Table S1** Source of 36 weedy rice accessions for initial scrutiny of possible origin from commercial hybrid rice.

| Sampling code | Abbreviation | Province  | Source location<br>(Population site) |
|---------------|--------------|-----------|--------------------------------------|
| WRLN001-01    | LN1          | Liaoning  | Shenyang                             |
| WRLN002-01    | LN2          | Liaoning  | Shenyang                             |
| WRLN003-01    | LN3          | Liaoning  | Shenyang                             |
| WRLN004-02    | LN4          | Liaoning  | Dandong                              |
| WRLN005-01    | LN5          | Liaoning  | Dandong                              |
| WRLN006-02    | LN6          | Liaoning  | Panjin                               |
| WRLN007-20    | LN7          | Liaoning  | Panjin                               |
| WRLN008-01    | LN8          | Liaoning  | Panjin                               |
| WRLN009-01    | LN9          | Liaoning  | Tieling                              |
| WRLN010-01    | LN10         | Liaoning  | Tieling                              |
| WRLN010-02    | LN11         | Liaoning  | Tieling                              |
| WRLN010-03    | LN12         | Liaoning  | Tieling                              |
| WRJS022-03    | JS1          | Jiangsu   | Yangzhou                             |
| WRJS022-04    | JS2          | Jiangsu   | Yangzhou                             |
| WRJS022-05    | JS3          | Jiangsu   | Yangzhou                             |
| WRJS022-06    | JS4          | Jiangsu   | Yangzhou                             |
| WRJS024-13    | JS5          | Jiangsu   | Yangzhou                             |
| WRJS024-14    | JS6          | Jiangsu   | Yangzhou                             |
| WRJS013-20    | JS7          | Jiangsu   | Taizhou                              |
| WRJS014-16    | JS8          | Jiangsu   | Taizhou                              |
| WRJS038-14    | JS9          | Jiangsu   | Nantong                              |
| WRJS038-15    | JS10         | Jiangsu   | Nantong                              |
| WRJS038-20    | JS11         | Jiangsu   | Nantong                              |
| WRJS039-02    | JS12         | Jiangsu   | Nantong                              |
| WRGD001-01    | GD1          | Guangdong | Zhanjiang                            |
| WRGD001-02    | GD2          | Guangdong | Zhanjiang                            |
| WRGD001-13    | GD3          | Guangdong | Zhanjiang                            |
| WRGD001-14    | GD4          | Guangdong | Zhanjiang                            |
| WRGD003-09    | GD5          | Guangdong | Zhanjiang                            |
| WRGD003-13    | GD6          | Guangdong | Zhanjiang                            |
| WRGD011-02    | GD7          | Guangdong | Zhanjiang                            |
| WRGD011-03    | GD8          | Guangdong | Zhanjiang                            |
| WRGD012-06    | GD9          | Guangdong | Zhanjiang                            |
| WRGD012-07    | GD10         | Guangdong | Zhanjiang                            |
| WRGD013-03    | GD11         | Guangdong | Zhanjiang                            |
| WRGD013-04    | GD12         | Guangdong | Zhanjiang                            |

**Supplementary Table S2 Source of additional 322 weedy rice accessions for scrutiny of possible origin from commercial hybrid rice**

| Population code<br>(number) | Sampling number | Province | Source location<br>(Population site) |
|-----------------------------|-----------------|----------|--------------------------------------|
| WRJS007                     | 4               | Jiangsu  | Lianyungang                          |
| WRJS013                     | 4               | Jiangsu  | Taizhou                              |
| WRJS014                     | 4               | Jiangsu  | Taizhou                              |
| WRJS015                     | 4               | Jiangsu  | Taizhou                              |
| WRJS023                     | 4               | Jiangsu  | Yangzhou                             |
| WRJS024                     | 4               | Jiangsu  | Yangzhou                             |
| WRJS025                     | 4               | Jiangsu  | Yangzhou                             |
| WRJS026                     | 4               | Jiangsu  | Yangzhou                             |
| WRJS027                     | 4               | Jiangsu  | Yangzhou                             |
| WRJS035                     | 4               | Jiangsu  | Taizhou                              |
| WRJS036                     | 4               | Jiangsu  | Yangzhou                             |
| WRJS037                     | 4               | Jiangsu  | Nantong                              |
| WRJS038                     | 4               | Jiangsu  | Nantong                              |
| WRJS044                     | 4               | Jiangsu  | Changzhou                            |
| WRJS045                     | 4               | Jiangsu  | Changzhou                            |
| WRJS046                     | 4               | Jiangsu  | Changzhou                            |
| WRJS047                     | 4               | Jiangsu  | Yangzhou                             |
| WRJS049                     | 4               | Jiangsu  | Taizhou                              |
| WRJS050                     | 4               | Jiangsu  | Nantong                              |
| WRJS051                     | 4               | Jiangsu  | Changzhou                            |
| WRJS052                     | 4               | Jiangsu  | Nantong                              |
| WRJS053                     | 4               | Jiangsu  | Yangzhou                             |
| WRJS054                     | 4               | Jiangsu  | Yangzhou                             |
| WRJS055                     | 4               | Jiangsu  | Yancheng                             |
| WRJS056                     | 4               | Jiangsu  | Suqian                               |
| WRJS057                     | 4               | Jiangsu  | Yancheng                             |
| WRJS058                     | 4               | Jiangsu  | Yancheng                             |
| WRJS059                     | 4               | Jiangsu  | Yangzhou                             |
| WRJS060                     | 4               | Jiangsu  | Taizhou                              |
| WRJS061                     | 4               | Jiangsu  | Zhenjiang                            |
| WRJS062                     | 4               | Jiangsu  | Yangzhou                             |
| WRJS063                     | 4               | Jiangsu  | Lianyungang                          |
| WRJS064                     | 4               | Jiangsu  | Lianyungang                          |
| WRJS065                     | 4               | Jiangsu  | Xuzhou                               |
| WRJS068                     | 4               | Jiangsu  | Yancheng                             |
| WRJS069                     | 4               | Jiangsu  | Yancheng                             |
| WRJS070                     | 4               | Jiangsu  | Huai'an                              |
| WRJS072                     | 4               | Jiangsu  | Taizhou                              |
| WRJS074                     | 4               | Jiangsu  | Nanjing                              |
| WRJS075                     | 4               | Jiangsu  | Nanjing                              |

|         |   |           |           |
|---------|---|-----------|-----------|
| WRJS076 | 4 | Jiangsu   | Changzhou |
| WRJS077 | 4 | Jiangsu   | Suzhou    |
| WRJS078 | 4 | Jiangsu   | Wuxi      |
| WRJS079 | 4 | Jiangsu   | Nanjing   |
| WRSH002 | 3 | Shanghai  | Chongming |
| WRAH005 | 3 | Anhui     | Wuhu      |
| WRAH017 | 3 | Anhui     | Maanshan  |
| WRHN001 | 3 | Henan     | Xinyang   |
| WRJX005 | 3 | Jiangxi   | Shangrao  |
| WRZJ007 | 3 | Zhejiang  | Shaoxing  |
| WRHU007 | 3 | Hunan     | Changde   |
| WRHU011 | 3 | Hunan     | Yiyang    |
| WRYN001 | 3 | Yunnan    | Kunming   |
| WRYN007 | 3 | Yunnan    | Dali/Dali |
| WRGZ003 | 3 | Guizhou   | Anshun    |
| WRGX001 | 3 | Guangxi   | Liuzhou   |
| WRGD001 | 3 | Guangdong | Zhanjiang |
| WRGD002 | 3 | Guangdong | Zhanjiang |
| WRGD003 | 3 | Guangdong | Zhanjiang |
| WRGD004 | 3 | Guangdong | Zhaoqing  |
| WRGD005 | 3 | Guangdong | Zhaoqing  |
| WRGD008 | 3 | Guangdong | Maoming   |
| WRGD009 | 3 | Guangdong | Maoming   |
| WRGD011 | 3 | Guangdong | Zhanjiang |
| WRGD012 | 3 | Guangdong | Zhanjiang |
| WRGD013 | 4 | Guangdong | Zhanjiang |
| WRGD016 | 3 | Guangdong | Zhanjiang |
| WRGD022 | 5 | Guangdong | Zhanjiang |
| WRGD023 | 5 | Guangdong | Zhanjiang |
| WRGD024 | 3 | Guangdong | Yangjiang |
| WRGD025 | 3 | Guangdong | Zhaoqing  |
| WRGD026 | 3 | Guangdong | Zhanjiang |
| WRGD027 | 3 | Guangdong | Zhaoqing  |
| WRGD028 | 3 | Guangdong | Zhanjiang |
| WRGD029 | 3 | Guangdong | Yangjiang |
| WRGD030 | 3 | Guangdong | Zhanjiang |
| WRGD031 | 3 | Guangdong | Zhanjiang |
| WRGD032 | 3 | Guangdong | Zhanjiang |
| WRGD033 | 3 | Guangdong | Zhaoqing  |
| WRGD034 | 3 | Guangdong | Zhaoqing  |
| WRHA008 | 3 | Hainan    | Dongfang  |
| WRHA009 | 3 | Hainan    | Dongfang  |
| WRHA010 | 3 | Hainan    | Dongfang  |
| WRHA011 | 3 | Hainan    | Dongfang  |
| WRHA013 | 3 | Hainan    | Lingshui  |
| WRHA014 | 3 | Hainan    | Lingshui  |

|         |   |        |          |
|---------|---|--------|----------|
| WRHA015 | 3 | Hainan | Lingshui |
| WRHA016 | 3 | Hainan | Yanzhou  |
| WRHA018 | 3 | Hainan | Qionghai |
| WRHA019 | 3 | Hainan | Wenchang |
| WRHA020 | 3 | Hainan | Haikou   |

---

**Supplementary Table S3 The index characters and their scoring standards of the Cheng's Index Method**

| Character                                             | Score/character state |                     |                 |                 |                  |
|-------------------------------------------------------|-----------------------|---------------------|-----------------|-----------------|------------------|
|                                                       | 0                     | 1                   | 2               | 3               | 4                |
| Glume hairiness                                       | Short, regular        | Short, less regular | Nearly glabrous | Long, irregular | Long, overlapped |
| Phenol reaction                                       | Dark                  | Light               | Very light      | Trace           | None             |
| Interval between 1st and 2nd node of panicle axis, cm | 1.5                   | 2.0                 | 2.5             | 3               | 3.5              |
| Glume color at heading                                | Greenish white        | Whitish green       | Yellowish green | Light green     | Green            |
| Leaf pubescence                                       | Very dense            | Dense               | Medium          | Few             | No               |
| Length-width ratio of spikelets                       | 4.0                   | 3.5                 | 3.0             | 2.5             | 2.0              |

Subspecies type is judged by totaling the scores of the six indexes, 0~8 considered as *indica* type, 9-13 for *indica*-cline type, 14-17 for *japonica*-cline type, 18-24 for *japonica* type.

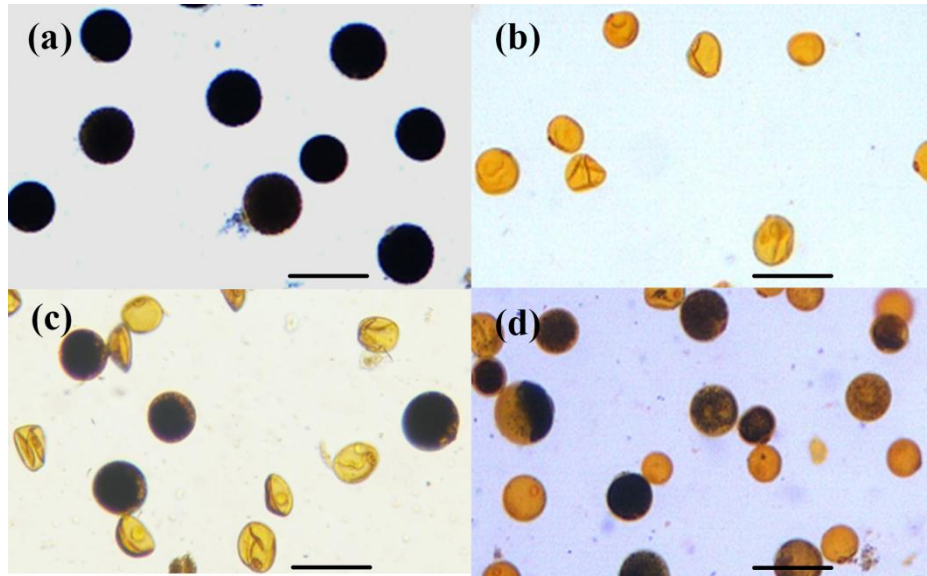

**Supplementary Figure S1** Morphology of pollen grains used to determine their viability.

(a) Normal fertile pollen grains stain black and exhibit similar particle size; (b) Aborted pollen grains stain yellow and are deformed; (c) Easily distinguished fertile and aborted pollen grains in hybrid progeny for which LTPA was the female parent and weedy rice was the male parent; (d) Difficult-to-distinguish fertile and aborted pollen grains in hybrid progeny for which S28A was the female parent and weedy rice was the male parent, because the presence of the Boro-type (BT) abortive pollen grains with spherical shape, different particle size and staining. Pollen grains were stained with 1% I<sub>2</sub>-KI solution. Bars, 50 μm.

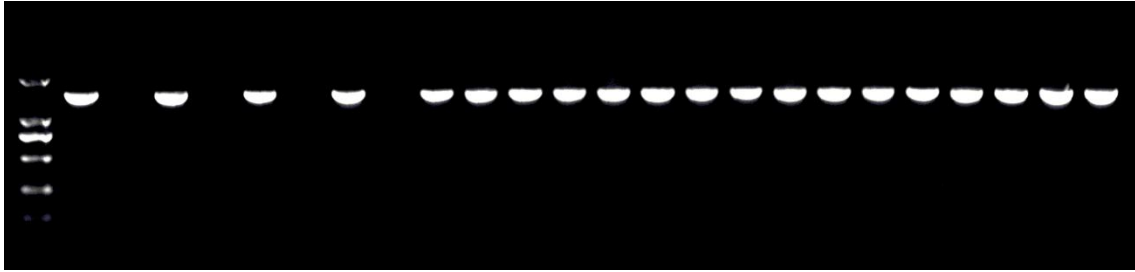

**Supplementary Figure S2** Corroboration of results obtained by *cms* marker using orWA352. Marker orWA352 only amplifies a 1432bp fragment from samples containing CMS-WA. Four wild abortive (WA) type sterile line samples and sixteen weedy rice accessions were confirmed to contain CMS-WA. The results corresponded to those obtained by the *cms* marker. From left to right: Marker (D2000 DNA ladder), Zhenshan97A, Zhenshan97B, Tianfeng A, Tianfeng B, Zhenpin A, Zhenpin B, LTPA, LTPB, WRJS026-01 (Jiangsu), WRHA016-01, WRHA016-03 (Hainan), GD9, GD10, GD11, GD12, WRGD012-04, WRGD013-06, WRGD013-13, WRGD013-17, WRGD022-03, WRGD022-06, WRGD022-09, WRGD022-10, WRGD022-13 (Guangdong). Sequenced amplified products contained the WA352 gene.

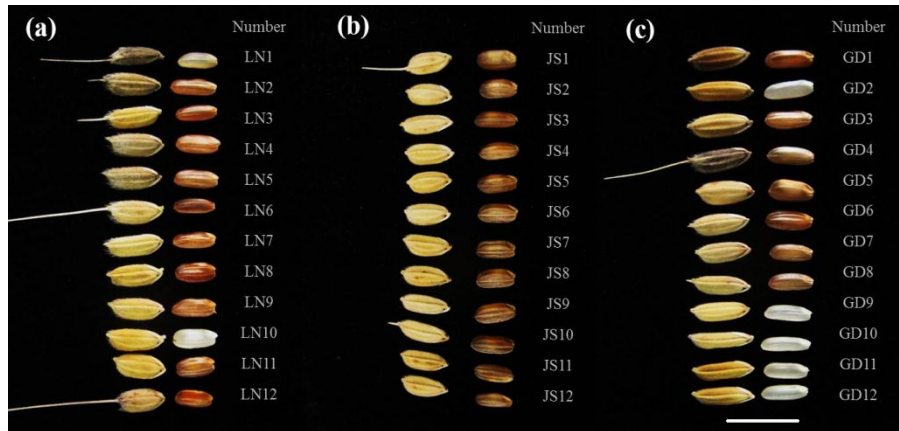

**Supplementary Figure S3** Caryopses of 36 weedy rice populations from three provinces in China. (a) Liaoning; (b) Jiangsu; (c) Guangdong. Bars, 10mm.



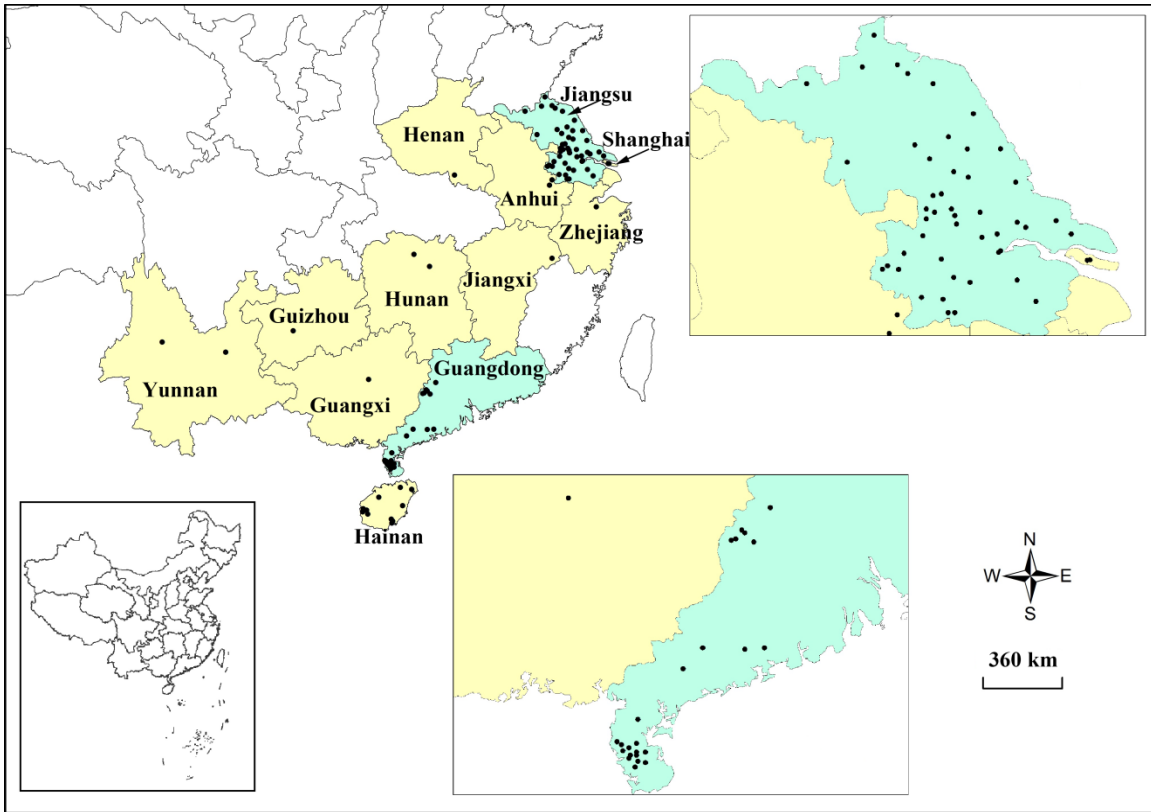

**Supplementary Figure S4** Collection sites of 91 weedy rice populations in 12 provinces where hybrid rice is widely planted. Maps generated using ArcGIS 10.0.
